# Supplementary material for: Enhancement of the Peroxidase-Like Activity of Iodine-Capped Gold Nanoparticles for the Colorimetric Detection of Biothiols
Source: PubMed Central journal article supplement (PMC7558680; doi:10.3390/bios10090113), 2020-09-01
Supplement: biosensors-10-00113-s001.pdf [file biosensors-10-00113-s001.pdf]

## Supplemental information

# Enhancement of the peroxidase-like activity of iodine-capped gold nanoparticles for the colorimetric detection of biothiols

Chia-Chen Chang <sup>1,\*</sup>, Tsz-Lian Hsu <sup>2</sup>, Chie-Pein Chen <sup>2,3</sup> and Chen-Yu Chen <sup>2,4\*</sup>

<sup>1</sup> Department of Medical Biotechnology and Laboratory Science, Chang Gung University, Taoyuan City, Taiwan

<sup>2</sup> Department of Obstetrics and Gynecology, Mackay Memorial Hospital, Taipei, Taiwan

<sup>3</sup> Department of Medical Research, MacKay Memorial Hospital, Taipei, Taiwan

<sup>4</sup> Department of Medicine, Mackay Medical College, New Taipei City, Taiwan

\* Correspondence: [chang@mail.cgu.edu.tw](mailto:chang@mail.cgu.edu.tw) (C.C.Chang), [f122481@mmh.org.tw](mailto:f122481@mmh.org.tw) (C.Y.Chen);

### Analysis of iodide using FITC-AuNPs

A solution of FITC-AuNPs was prepared according to a previous study. Briefly, 1  $\mu\text{L}$  of 0.5 mM FITC was added to 1000  $\mu\text{L}$  citrate-capped AuNPs. This mixture was equilibrated at 4°C for 24 h. After 24 h, 20  $\mu\text{L}$  of FITC-capped AuNPs were mixed with 20  $\mu\text{L}$  of different concentrations of I<sup>-</sup>. The final volume of the resulting mixture was increased to 100  $\mu\text{L}$  through the addition of ultrapure water for 30 min. The fluorescence intensity was monitored at 525 nm (excitation at 495 nm) using a SpectraMax M2 microplate fluorescence reader (Molecular Devices, Sunnyvale, CA, USA).

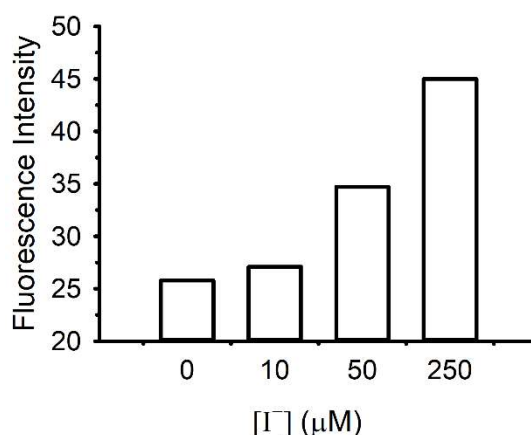

Figure S1. Difference in the fluorescence intensity of FITC-AuNPs before and after the addition of I<sup>-</sup>.

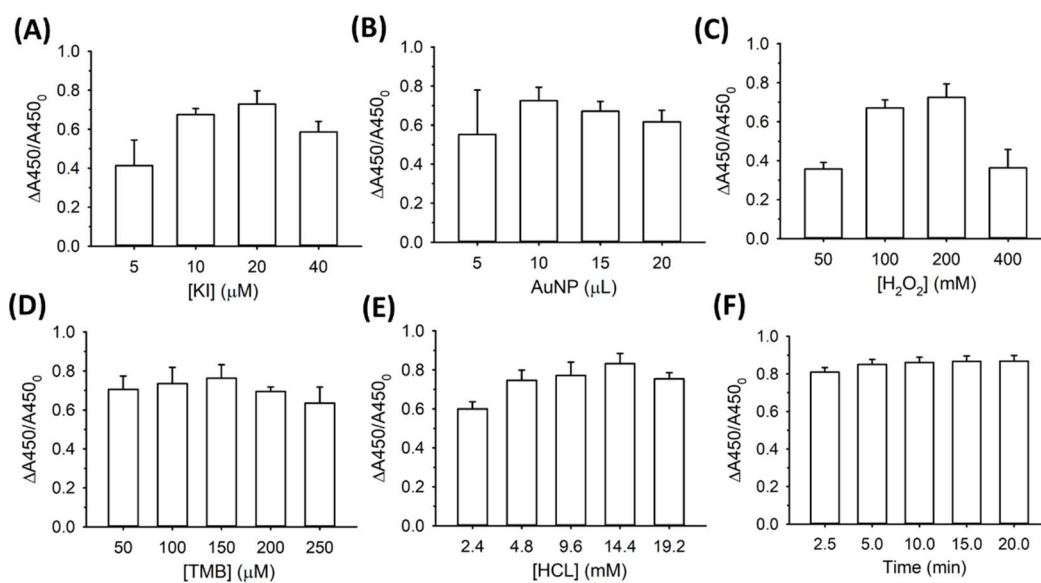

Figure S2. (A) Effect of the volume of AuNPs on the detection of 50  $\mu\text{M}$  cysteine. Effect of the concentration of (B) TMB, (C) I<sup>-</sup>, (D) HCl, and (E) H<sub>2</sub>O<sub>2</sub> on the normalized absorbance ratio ( $\Delta A_{450}/A_{450_0}$ ). (E) Effect of reaction time;  $\Delta A_{450} = A_{450_0} - A_{450_x}$ .  $A_{450_0}$  and  $A_{450_x}$  correspond to the absorption intensity of the reaction solution in the absence and presence of cysteine, respectively.
